# Supplementary material for: Synthesis of fused cyanopyrroles and spirocyclopropanes via addition of N-ylides to chalconimines
Source: Royal Society of Chemistry journal article supplement (doi:10.1039/c7ob00529f), 2017-01-01
Supplement: c7ob00529f2.pdf [file c7ob00529f2.pdf]

## Synthesis of Fused Cyanopyrroles and Spirocyclopropanes Via Addition of *N*-Ylide to Chalconimines

Siba Prasad Midya, Elumalai Gopi, Nishikant Satam and Irishi N. N. Namboothiri\*

Department of Chemistry, Indian Institute of Technology, Bombay, Mumbai 400 076

| entry |                                             | page |
|-------|---------------------------------------------|------|
|       | Selected X-ray data                         | 1    |
| 1     | Table S1. Selected X-ray data for <b>3a</b> | 1    |
| 2     | Table S2. Selected X-ray data for <b>6c</b> | 2    |

### Selected X-ray data

Table S1. Selected X-ray data for **3a**

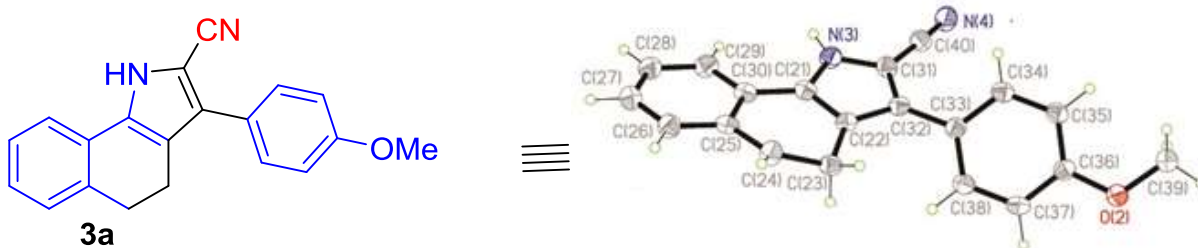

|                                    |                                                                     |
|------------------------------------|---------------------------------------------------------------------|
| Crystal data                       |                                                                     |
| Chemical formula                   | C <sub>20</sub> H <sub>16</sub> N <sub>2</sub> O                    |
| <i>M<sub>r</sub></i>               | 300.35                                                              |
| Crystal system, space group        | Orthorhombic, <i>P</i> 2 <sub>1</sub> 2 <sub>1</sub> 2 <sub>1</sub> |
| Temperature (K)                    | 100                                                                 |
| <i>a</i> , <i>b</i> , <i>c</i> (Å) | 7.199 (3), 13.738 (5), 30.836 (12)                                  |
| <i>V</i> (Å <sup>3</sup> )         | 3050 (2)                                                            |
| <i>Z</i>                           | 8                                                                   |
| Radiation type                     | Mo <i>K</i> α                                                       |
| μ (mm <sup>-1</sup> )              | 0.08                                                                |
| Crystal size (mm)                  | 0.23 × 0.18 × 0.15                                                  |
| Data collection                    |                                                                     |
| Diffractometer                     | CCD diffractometer                                                  |
| Absorption correction              | Numerical                                                           |

|                                                                            |                               |
|----------------------------------------------------------------------------|-------------------------------|
|                                                                            | number                        |
| $T_{\min}, T_{\max}$                                                       | 0.981, 0.988                  |
| No. of measured, independent and observed [ $I > 2\sigma(I)$ ] reflections | 23094, 5564, 4866             |
| $R_{\text{int}}$                                                           | 0.062                         |
| $(\sin \theta/\lambda)_{\max}$ ( $\text{\AA}^{-1}$ )                       | 0.602                         |
| Refinement                                                                 |                               |
| $R[F^2 > 2\sigma(F^2)], wR(F^2), S$                                        | 0.054, 0.134, 1.02            |
| No. of reflections                                                         | 5564                          |
| No. of parameters                                                          | 415                           |
| H-atom treatment                                                           | H-atom parameters constrained |
| $\Delta\rho_{\max}, \Delta\rho_{\min}$ ( $e \text{\AA}^{-3}$ )             | 0.17, -0.21                   |

**Table S2. Selected X-ray data for 6c**

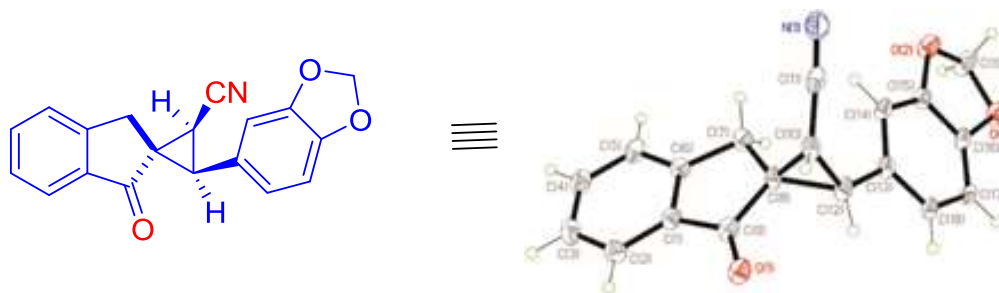

|                             |                                         |
|-----------------------------|-----------------------------------------|
| Crystal data                |                                         |
| Chemical formula            | $\text{C}_{19}\text{H}_{13}\text{NO}_3$ |
| $M_r$                       | 303.30                                  |
| Crystal system, space group | Monoclinic, $P2_1/n$                    |
| Temperature (K)             | 100                                     |
| $a, b, c$ ( $\text{\AA}$ )  | 9.350 (4), 8.514 (3), 18.643 (7)        |
| $\beta$ ( $^\circ$ )        | 103.789 (18)                            |
| $V$ ( $\text{\AA}^3$ )      | 1441.3 (10)                             |
| $Z$                         | 4                                       |
| Radiation type              | Mo $K\alpha$                            |
| $\mu$ ( $\text{mm}^{-1}$ )  | 0.10                                    |

|                                                                            |                                           |
|----------------------------------------------------------------------------|-------------------------------------------|
| Crystal size (mm)                                                          | 0.28 × 0.20 × 0.16                        |
| Data collection                                                            |                                           |
| Diffractometer                                                             | Rigaku Saturn724 diffractometer           |
| Absorption correction                                                      | Numerical<br><i>NUMABS</i> (Rigaku, 1999) |
| $T_{\min}, T_{\max}$                                                       | 0.974, 0.985                              |
| No. of measured, independent and observed [ $I > 2\sigma(I)$ ] reflections | 12578, 2506, 1318                         |
| $R_{\text{int}}$                                                           | 0.098                                     |
| $(\sin \theta/\lambda)_{\text{max}}$ ( $\text{\AA}^{-1}$ )                 | 0.595                                     |
| Refinement                                                                 |                                           |
| $R[F^2 > 2\sigma(F^2)], wR(F^2), S$                                        | 0.054, 0.150, 0.98                        |
| No. of reflections                                                         | 2506                                      |
| No. of parameters                                                          | 208                                       |
| H-atom treatment                                                           | H-atom parameters constrained             |
| $\Delta\rho_{\text{max}}, \Delta\rho_{\text{min}}$ ( $\text{e \AA}^{-3}$ ) | 0.30, -0.32                               |
